# Supplementary material for: Enhancing Thermal Conductivity of CNT/AlN/Silicone Rubber Composites through Directly Grown CNTs on AlN for Reduced Filler Filling Ratio
Source: Preprints.org preprint supplement (doi:10.20944/preprints202402.1559.v1), 2024-02-27
Supplement: Supplementary file 1 [file supplementary]

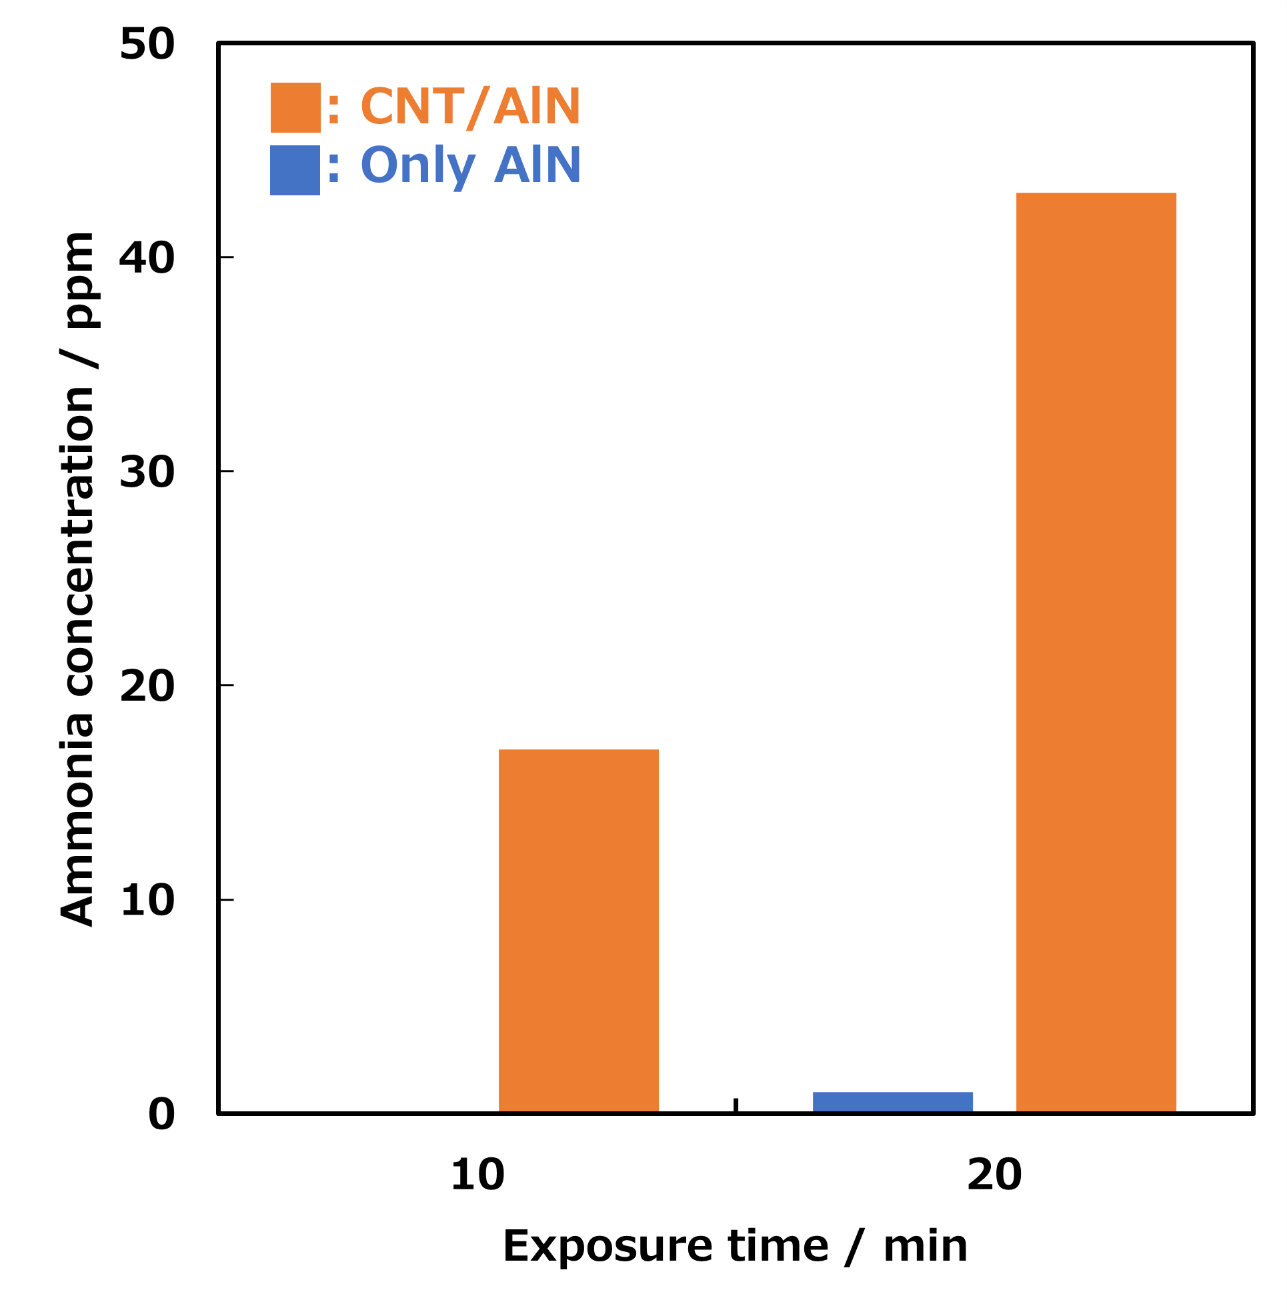
**Supplemental Fig.1** Variation of ammonia concentration in AlN or AlN/CNT composite filler as a function of time of atmospheric exposure (atmospheric exposure conditions: Temperature: 24.3oC, Humidity: 75%)
